# Supplementary material for: Synergistic SERS enhancement and in situ monitoring of photocatalytic reactions in a plasmonic metal/ferroelectric hybrid system by the light-induced pyroelectric effect
Source: Royal Society of Chemistry journal article supplement (doi:10.1039/d2ta02678c), 2022-01-01
Supplement: d2ta02678c1.pdf [file d2ta02678c1.pdf]

## Supporting Information

### Synergistic SERS enhancement and in situ monitoring of photocatalytic reaction in plasmonic metal/ferroelectric hybrid system by light-induced pyroelectric effect

Daotong You<sup>a,#</sup>, Ru Wang<sup>c,#</sup>, Jiwei Xie<sup>a</sup>, Lei Liu<sup>a</sup>, Kaiwei Li<sup>a</sup>, Xile Han<sup>a</sup>, Tuan Guo<sup>a,\*</sup> and Chunxiang Xu<sup>b,\*</sup>

*a. Institute of Photonics Technology, Jinan University, Guangzhou, Guangdong 510632, China*

*b. State Key Laboratory of Bioelectronics, School of Biological Sciences & Medical Engineering, Southeast University, Nanjing 210096, China*

*c. College of Physics and Optoelectronic Engineering, Shenzhen University, Shenzhen 518060, China*

\* Corresponding Authors.

E-mail address: D. T. You ([youdaotong@jnu.edu.cn](mailto:youdaotong@jnu.edu.cn)), T. Guo ([tuanguo@jnu.edu.cn](mailto:tuanguo@jnu.edu.cn))  
and C.X. Xu ([xcxseu@seu.edu.cn](mailto:xcxseu@seu.edu.cn))

# These authors contributed equally to this work.

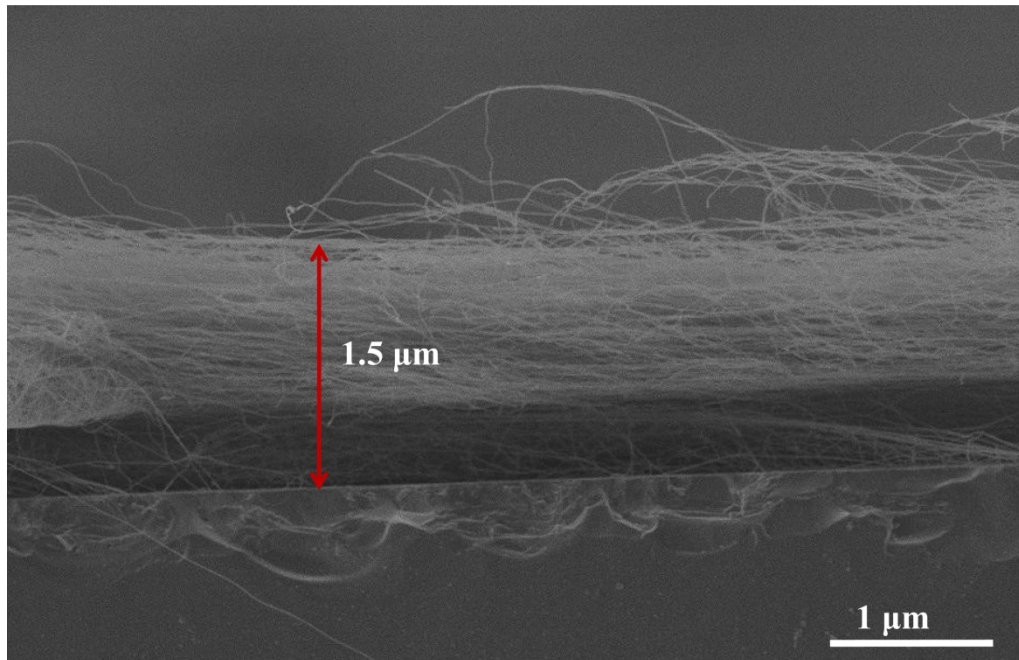

**Fig. S1.** SEM cross-sectional view of BiFeO<sub>3</sub>/Carbon nanofibers.

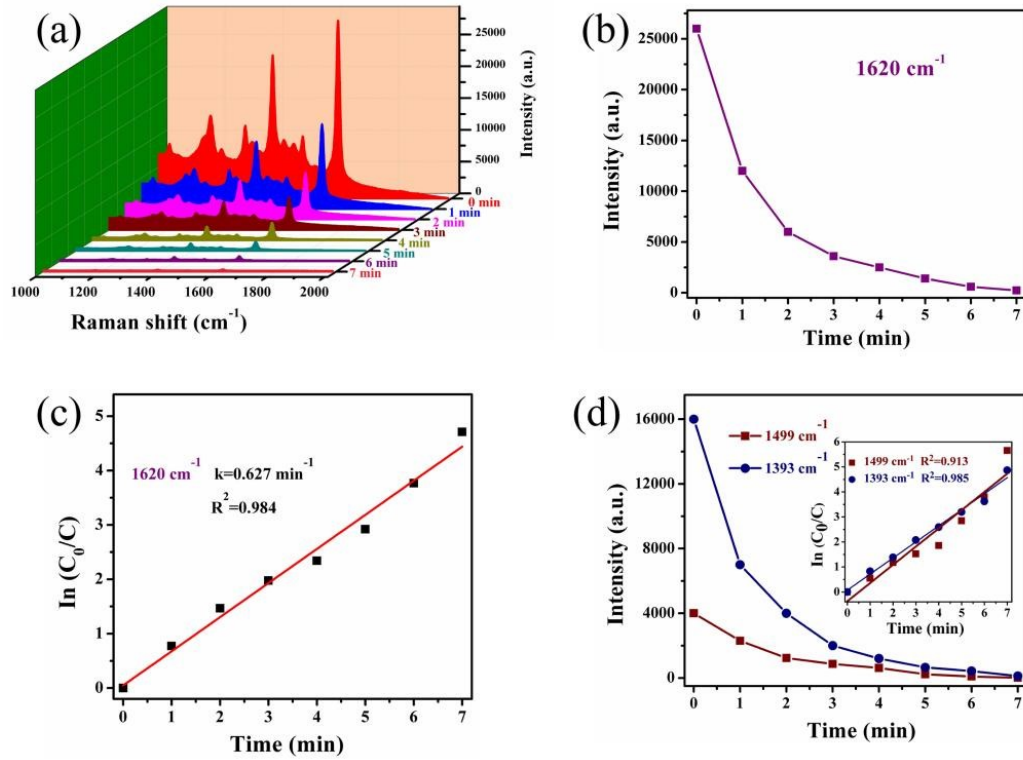

**Fig. S2.** (a) In situ SERS spectra of MB exposed to 532 nm laser irradiation using Ag-BiFeO<sub>3</sub>/CNFs as substrate. (b) The relative intensity of the Raman band at 1620  $\text{cm}^{-1}$  as a function of measurement time. (c) The concentration variation ( $\ln(C_0/C)$ ) versus reaction time. (d) The relative intensity of the Raman band at 1393 and 1499  $\text{cm}^{-1}$  as a function of measurement time and corresponding the concentration variation ( $\ln(C_0/C)$ ) versus reaction time.

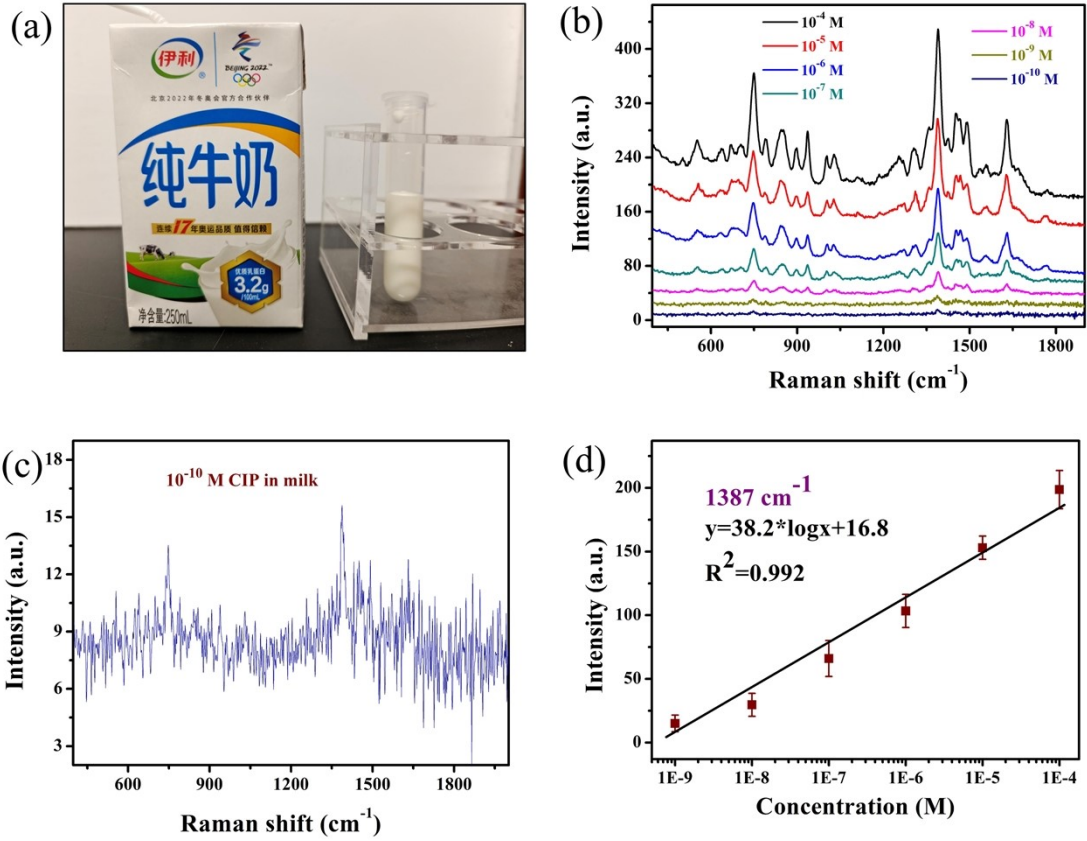

**Fig. S3.** (a) The physical picture of milk used for testing. (b) SERS spectra of CIP in milk at different concentrations from  $10^{-10}$  to  $10^{-4}$  M using Ag nanowires-BiFeO<sub>3</sub>/CNFs SERS substrate, (b) SERS signal at a concentration of  $10^{-10}$  M. (d) The curve relationship between SERS intensity at  $1387 \text{ cm}^{-1}$  and concentrations of CIP solution.
